# Supplementary material
Source: MDPI journal article supplement (https://www.mdpi.com/1424-2818/14/4/283)
Supplement: s1 [file s1]

**Table S1.** The list of all types of social and genetic relationships between offspring and parents.

| Offspring |                 |                                                              | Social and genetic mother |                                                  | Sire         |                                                                                                | Social father |                                                                                                |
|-----------|-----------------|--------------------------------------------------------------|---------------------------|--------------------------------------------------|--------------|------------------------------------------------------------------------------------------------|---------------|------------------------------------------------------------------------------------------------|
| Type #    | Abbreviation    | Description                                                  | Abbreviation              | Description                                      | Abbreviation | Description                                                                                    | Abbreviation  | Description                                                                                    |
| 1         | WPO             | within-pair offspring                                        | $F_{EPY\ 0}$              | not obtained EPP, EPY-neutral, mostly monogamous | $M_{EPY\ 0}$ | did not gain EPP, and did not lose paternity in their own nest, EPY-neutral, mostly monogamous | $M_{EPY\ 0}$  | did not gain EPP, and did not lose paternity in their own nest, EPY-neutral, mostly monogamous |
| 2         | Mat HSib of EPO | maternal (within-pair) half-siblings of extra-pair offspring | $F_{EPY+}$                | obtained EPP, EPY-positive                       | $M_{EPY-}$   | lost paternity in their own nest, but did not gain EPP elsewhere, EPY-negative                 | $M_{EPY-}$    | lost paternity in their own nest, but did not gain EPP elsewhere, EPY-negative                 |
| 3         | EPO             | extra-pair offspring                                         | $F_{EPY+}$                | obtained EPP, EPY-positive                       | $M_{EPY+}$   | gained EPP, but could have also lost paternity in their own nest, EPY-positive                 | $M_{EPY-}$    | lost paternity in their own nest, but did not gain EPP elsewhere, EPY-negative                 |
| 4         | Pat HSib of EPO | paternal (within-pair) half-siblings of extra-pair offspring | $F_{EPY-}$                | breeding with EPY-positive males                 | $M_{EPY+}$   | gained EPP, but could have also lost paternity in their own nest, EPY-positive                 | $M_{EPY+}$    | gained EPP, but could have also lost paternity in their own nest, EPY-positive                 |
