# Supplementary material
Source: MDPI journal article supplement (https://www.mdpi.com/1424-2818/14/4/283)
Supplement: s1 [file s1]

**Table S2.** The set of models investigated in the MARK program.

| Line # | Model # | Model                                                        | N parameters | $AIC_c$ | $\Delta AIC_c$ | $\omega_i$             | Deviance |
|--------|---------|--------------------------------------------------------------|--------------|---------|----------------|------------------------|----------|
| 1      | 7       | Phi(~time)p(~time)                                           | 14           | 1162.8  | 0.0            | 0.539                  | 97.4     |
| 2      | 17      | Phi(~time + Type)p(~time)                                    | 17           | 1164.4  | 1.7            | 0.236                  | 93.0     |
| 3      | 9       | Phi(~time)p(~time + Type)                                    | 17           | 1165.1  | 2.3            | 0.171                  | 93.6     |
| 4      | 19      | Phi(~time + Type)p(~time + Type)                             | 20           | 1167.4  | 4.6            | 0.053                  | 89.8     |
| 5      | 6       | Phi(~time)p(~1)                                              | 8            | 1177.7  | 14.9           | $3.14 \times 10^{-4}$  | 124.5    |
| 6      | 16      | Phi(~time + Type)p(~1)                                       | 11           | 1179.0  | 16.2           | $1.60 \times 10^{-4}$  | 119.8    |
| 7      | 8       | Phi(~time)p(~Type)                                           | 11           | 1181.1  | 18.3           | $5.60 \times 10^{-5}$  | 121.9    |
| 8      | 18      | Phi(~time + Type)p(~Type)                                    | 14           | 1183.4  | 20.6           | $1.78 \times 10^{-5}$  | 118.1    |
| 9      | 10      | Phi(~time)p(~time + Type + time * Type)                      | 35           | 1183.5  | 20.8           | $1.68 \times 10^{-5}$  | 74.9     |
| 10     | 20      | Phi(~time + Type)p(~time + Type + time * Type)               | 38           | 1184.6  | 21.8           | $1.00 \times 10^{-5}$  | 69.6     |
| 11     | 22      | Phi(~time + Type + time * Type)p(~time)                      | 35           | 1184.9  | 22.1           | $8.66 \times 10^{-6}$  | 76.2     |
| 12     | 24      | Phi(~time + Type + time * Type)p(~time + Type)               | 38           | 1187.9  | 25.1           | $1.87 \times 10^{-6}$  | 73.0     |
| 13     | 4       | Phi(~1)p(~time + Type)                                       | 11           | 1194.7  | 31.9           | $6.25 \times 10^{-8}$  | 135.5    |
| 14     | 2       | Phi(~1)p(~time)                                              | 8            | 1195.1  | 32.3           | $5.24 \times 10^{-8}$  | 141.9    |
| 15     | 12      | Phi(~Type)p(~time)                                           | 11           | 1195.1  | 32.3           | $5.13 \times 10^{-8}$  | 135.9    |
| 16     | 14      | Phi(~Type)p(~time + Type)                                    | 14           | 1196.9  | 34.2           | $2.07 \times 10^{-8}$  | 131.6    |
| 17     | 21      | Phi(~time + Type + time * Type)p(~1)                         | 29           | 1201.7  | 38.9           | $1.96 \times 10^{-9}$  | 105.5    |
| 18     | 23      | Phi(~time + Type + time * Type)p(~Type)                      | 32           | 1205.6  | 42.8           | $2.68 \times 10^{-10}$ | 103.2    |
| 19     | 25      | Phi(~time + Type + time * Type)p(~time + Type + time * Type) | 56           | 1210.6  | 47.8           | $2.26 \times 10^{-11}$ | 57.4     |
| 20     | 5       | Phi(~1)p(~time + Type + time * Type)                         | 29           | 1221.5  | 58.7           | $9.45 \times 10^{-14}$ | 125.3    |
| 21     | 15      | Phi(~Type)p(~time + Type + time * Type)                      | 32           | 1223.2  | 60.4           | $4.08 \times 10^{-14}$ | 120.8    |
| 22     | 3       | Phi(~1)p(~Type)                                              | 5            | 1297.1  | 134.3          | 0.00                   | 249.9    |
| 23     | 11      | Phi(~Type)p(~1)                                              | 5            | 1299.2  | 136.4          | 0.00                   | 252.1    |
| 24     | 1       | Phi(~1)p(~1)                                                 | 2            | 1300.2  | 137.4          | 0.00                   | 259.1    |
| 25     | 13      | Phi(~Type)p(~Type)                                           | 8            | 1301.4  | 138.6          | 0.00                   | 248.2    |

Phi ( $\varphi$ ) is the local survival probability; p is the encounter probability;  $AIC_c$  is the Akaike's Information Criterion corrected for the effective sample size;  $\Delta AIC_c$  is the difference in the  $AIC_c$  value between each model in the set and the model with the lowest  $AIC_c$ ;  $\omega_i$  is the normalized Akaike weights. The model formulas are written in R formulation. Type in the formulas is the fledgelings type (see Classification of individuals section in Methods)
